# Supplementary material for: Receptor-Interacting Protein Kinases 1 and 3, and Mixed Lineage Kinase Domain-Like Protein Are Activated by Sublytic Complement and Participate in Complement-Dependent Cytotoxicity
Source: PubMed Central journal article supplement (PMC5829068; doi:10.3389/fimmu.2018.00306), 2018-02-23
Supplement: presentation_1.pdf [file presentation_1.pdf]

# RIPK1, RIPK3 and MLKL are activated by sublytic complement and participate in complement-dependent cytotoxicity

Michal Lusthaus, Niv Mazkereth, Natalie Donin and Zvi Fishelson

Department of Cell and Developmental Biology, Sackler School of Medicine, Tel Aviv University, Tel Aviv 69978, Israel

## Supplementary figures

Figure S1

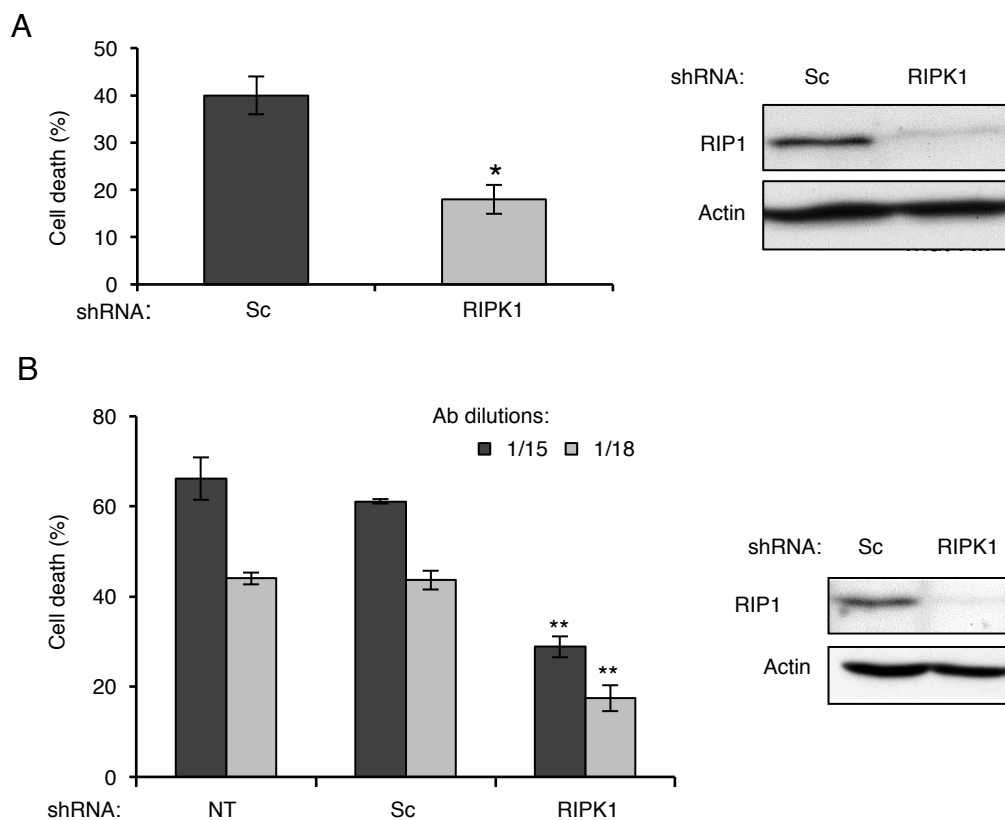

**Figure S1. Silencing of RIPK1 by shRNA reduces CDC.**

(A) HEK-293T cells transfected for 48 h with RIPK1-shRNA or a scrambled (Sc) shRNA or (B) K562 cells stably transfected with RIPK1 shRNA or scrambled shRNA were subjected to antibody and complement (NHS, 50%) treatment for 60 min at 37°C and cell death was measured by PI inclusion. Results of 3 independent experiments are expressed as mean percent cell death  $\pm$  SD. \* $P < 0.05$ , \*\* $P < 0.001$  relative to cells expressing scrambled shRNA. Knockdown efficiency of RIPK1 was examined by Western blotting of cell lysates with anti-RIPK1 or anti-actin antibodies (right inserts). NT, non-treated.

Figure S2

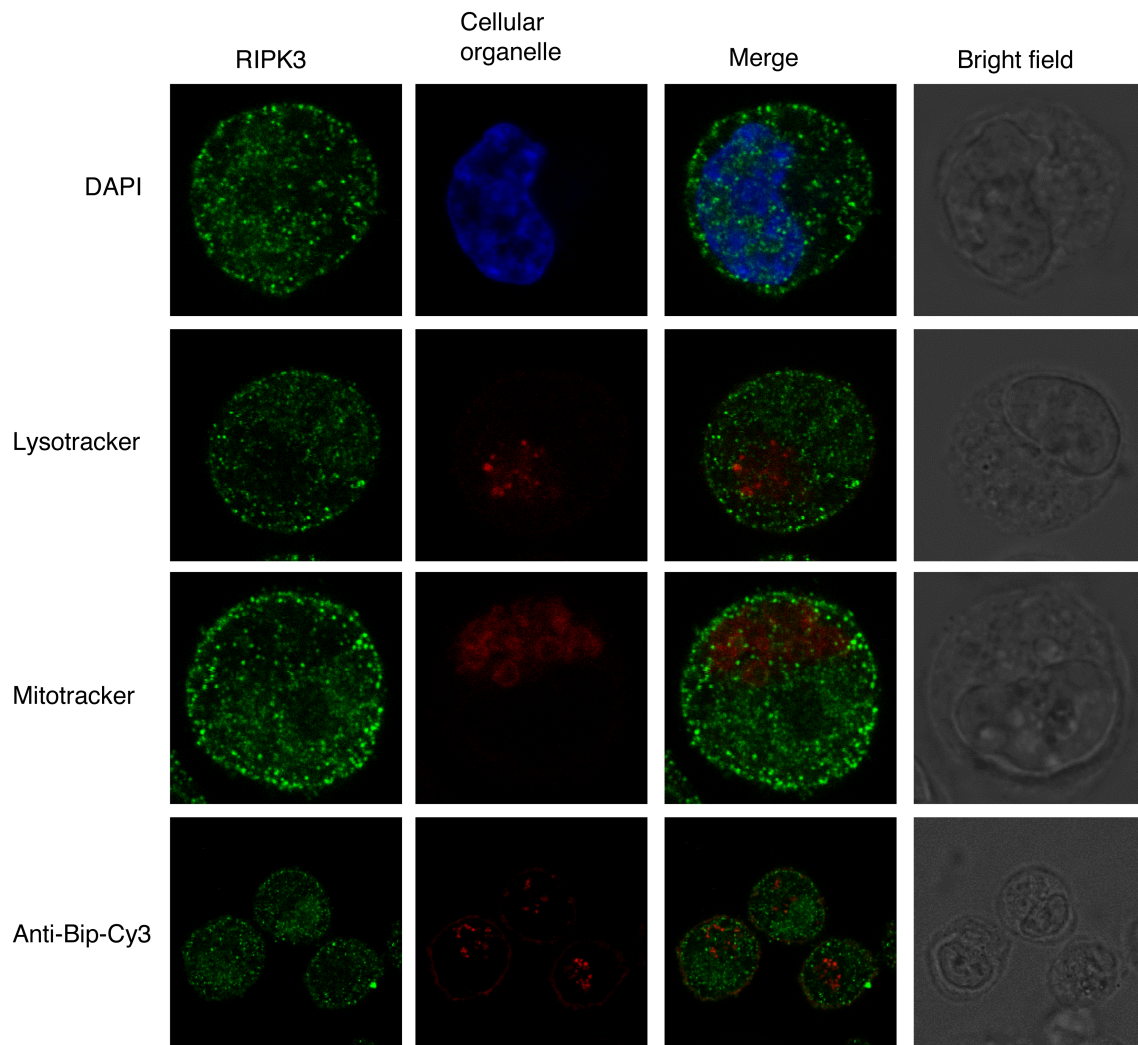

**Figure S2. RIPK3 aggregates are not located within cellular organelles.**

K562 Flag-RIPK3 transfected cells were treated for 10 min with complement at a sublytic dose, followed by fixation with 2% paraformaldehyde and permeabilization with 0.1% saponin. Flag-RIPK3 was immunostained with AF-488-labeled anti-Flag antibody. Nuclei, lysosomes and mitochondria were stained with DAPI, LysoTracker and MitoTracker, respectively. ER was stained with anti-GRP78 Bip antibody, followed by Cy3 labeled secondary antibody.
